# Supplementary material
Source: publisher figshare collection journal article supplement (https://sage.figshare.com/ndownloader/files/24183411)
Supplement: Supplementary file 1 [file 24183411]

## Supporting Information

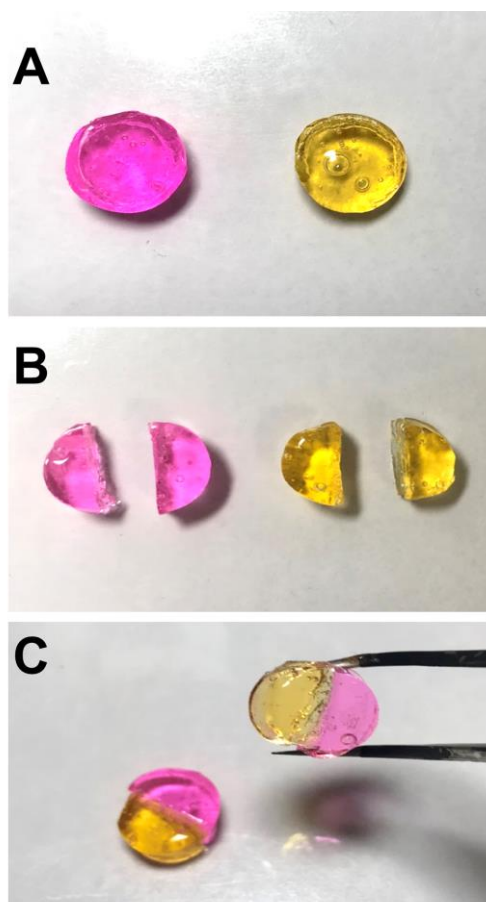

**Figure S1.** The self-healing property of hydrogels, namely the hydrogels can be reconstituted after being destroyed by external forces.

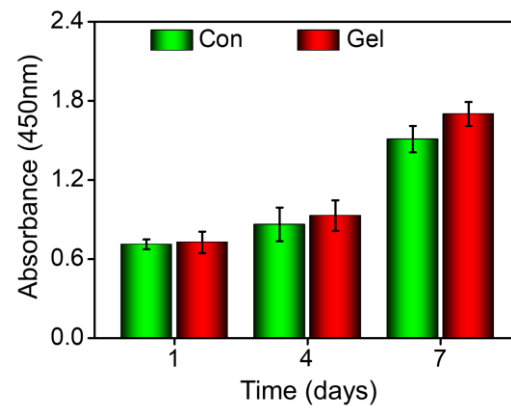

**Figure S2.** CCK-8 assay was used to assess BM-MSC proliferation when cultured in the hydrogel for 1, 4, and 7 days.

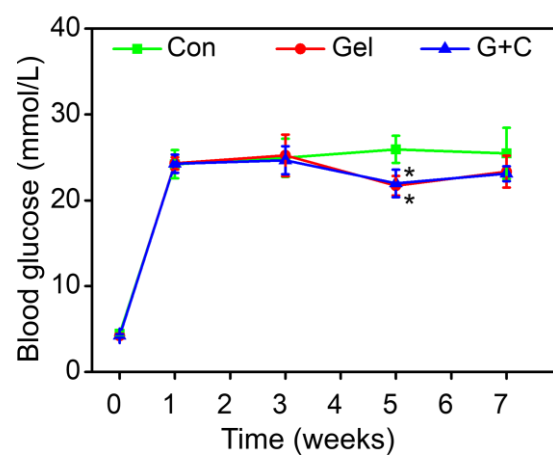

**Figure S3.** Blood glucose levels across the duration of the experiment (\*P < 0.05).

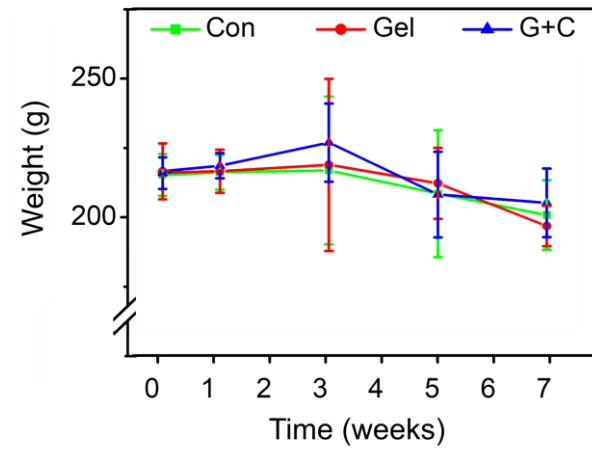

**Figure S4.** Body weight across the duration of the experiment (\*P < 0.05).

Table S1. Scoring system for sub-epithelial matrix maturation.

| Score | Characteristics                                                                                                                                       |
|-------|-------------------------------------------------------------------------------------------------------------------------------------------------------|
| 0–1   | None to minimal matrix accumulation. No granulation tissue.                                                                                           |
| 1–2   | Granulation tissue dominated by inflammatory cells but with minimal fibroblasts, capillaries, or collagen deposition.                                 |
| 2–3   | Moderately thick granulation tissue, moderate inflammation, moderate fibroblast and collagen deposition, but with extensive neovascularization.       |
| 3–4   | Thick, vascularized granulation tissue dominated by fibroblasts and extensive collagen deposition.                                                    |
| 4–5   | Thick vascularized granulation tissue dominated by fibroblasts and extensive collagen deposition, demonstrating parallel collagen fiber organization. |
